# Supplementary material for: Lung cancer risk in relation to jobs held in a nationwide case–control study in Iran
Source: HighWire-hosted journal article supplement (doi:10.1136/oemed-2022-108463), 2022-09-07
Supplement: oemed-2022-108463supp001_data_supplement.pdf [file oemed-2022-108463supp001_data_supplement.pdf]

## Supplementary Materials

The following are available at the supplementary materials, Table S1: The 5-digit ISCO-68 codes corresponding to each specific selected job, Table S2: Risk of lung cancer associated with the duration of employment as a construction worker, in male, Table S3: Risk of lung cancer associated with the duration of employment as a farmer, stratified sex.

Table S1: The 5-digit ISCO-68 codes corresponding to each specific selected job

| Selected specific occupations from (ISCO-68) | Five-digits codes                                                                                                             |
|----------------------------------------------|-------------------------------------------------------------------------------------------------------------------------------|
| Textile industry workers                     | 7-00.70, 7-51.10 to 7-59.90, 7-91.00 to 7-91.90, 7-93.00 to 7-99.90, 8-35.60                                                  |
| Painters                                     | 9-31.00 to 9-39.90                                                                                                            |
| Construction workers                         | 9-51.00 to 9-52.90, 9-55.00 to 9-59.99, 9-75.24 to 9-74.40, 9-72.20, 9-73.35, 9-99.10                                         |
| Drivers                                      | 6-28.20, 6-31.40, 9-83.20 to 9-83.90, 9-85.20 to 9-85-90, 9-79.30 to 9-79.90, 9-83.00 to 9-83.90, 9-85.00 to 9-85.90, 9-89.90 |
| Road drivers                                 | 9-85.20 to 9-85-50, 9-85-70, 9-85-90                                                                                          |
| Heavy vehicles drivers                       | 6-28.20, 6-31.40, 9-79.30 to 9-79.90, 9-83.00 to 9-83.90, 9-85-60, 9-89.90                                                    |
| Welders                                      | 8-72.10 -8-72.90                                                                                                              |
| Farmers                                      | 6-11.00 to 6-49.90                                                                                                            |
| Only field farmers                           | 6-11.00 to 6-12.30, 6-12.70, 6-12.90, 6-21.05 to 6-23.90, 6-28.20 to 6-28.90, 6-29.40 to 6-29.60, 6-29.90, 6-31.10 to 6-32.90 |
| Only animal farmers                          | 6-12.40 to 6-12.60, 6-12.90, 6-24.10 to 6-26.90, 6-29.20 to 6-29.30, 6-29.90, 6-41.00 to 6-49.90                              |
| Petroleum industry workers                   | 7-13.20 to 7-13.90, 7-43.50, 7-45.20 to 7-45.90, 9-69.40, 9-72.50                                                             |
| Bakers                                       | 7-76.10 to 7-76.90                                                                                                            |
| Rubber industry workers                      | 7-49.90, 9-01.20 to 9-01.50, 9-02.20 to 9-02.90                                                                               |

Note: ISCO-68, International Standard Classification of Occupations.

Table S2: Risk of lung cancer associated with the duration of employment as a construction worker, in males.

| Duration of employment as a construction worker (years)                 | N<br>(Cases/Controls) | Model 0 <sup>a</sup><br>OR (95% CI) | Model 1 <sup>b</sup><br>OR (95% CI) | Model 2 <sup>c</sup><br>OR (95% CI) |
|-------------------------------------------------------------------------|-----------------------|-------------------------------------|-------------------------------------|-------------------------------------|
| Never being employed                                                    |                       | ref                                 | ref                                 | ref                                 |
| ≤28                                                                     | 48/ 190               | 1.4 (1.0, 2.1)                      | 1.2 (0.8, 1.8)                      | 1.1 (0.7, 1.6)                      |
| >28                                                                     | 47/ 128               | 1.8 (1.3, 2.5)                      | 1.7 (1.2, 2.4)                      | 1.6 (1.1, 2.4)                      |
| Continues duration of employment<br>( <i>P</i> value <sub>trend</sub> ) |                       | 1.2 (1.1, 1.2)<br>(<0.001)          | 1.1 (1.0, 1.2)<br>(<0.001)          | 1.1 (1.0, 1.2)<br>(<0.001)          |

Note: N, number; OR, odds ratio; CI, confidence interval.

<sup>a</sup> Model 0 (M0) is adjusted for age categories (5-year categories) and residence (provinces)

<sup>b</sup> Model 1 (M1) is adjusted for M0 plus cigarette smoking status and intensity.

<sup>c</sup> Model 2 (M2) is adjusted for M1 plus opium consumption.

Table S3: Risk of lung cancer associated with the duration of employment as a farmer, stratified by sex.

| Duration of employment as a farmer (years)               | N<br>(Cases/Controls) |            | Model 0 <sup>a</sup><br>OR (95% CI) |                           | Model 1 <sup>b</sup><br>OR (95% CI) |                           | Model 2 <sup>c</sup><br>OR (95% CI) |                           |
|----------------------------------------------------------|-----------------------|------------|-------------------------------------|---------------------------|-------------------------------------|---------------------------|-------------------------------------|---------------------------|
|                                                          | Male                  | Female     | Male                                | Female                    | Male                                | Female                    | Male                                | Female                    |
| Never being employed                                     | 342/ 1,734            | 139/ 1,010 | ref                                 | ref                       | ref                                 | ref                       | ref                                 | ref                       |
| ≤35                                                      | 56/ 251               | 12/ 31     | 1.1 (0.9, 1.7)                      | 4.3 (1.9, 9.7)            | 1.1 (0.8, 1.6)                      | 4.5 (2.0, 10.0)           | 1.0 (0.7, 1.4)                      | 4.7 (1.9, 11.6)           |
| >35                                                      | 103/ 413              | 6/ 38      | 1.2(0.9, 1.5)                       | 1.2 (0.4, 3.1)            | 1.2 (0.9, 1.5)                      | 1.2 (0.5, 3.2)            | 1.1 (0.8, 1.4)                      | 1.5 (0.6, 4.1)            |
| 10 years interval<br>( <i>P</i> value <sub>trend</sub> ) |                       |            | 1.1 (0.9, 1.3),<br>(0.10)           | 1.0 (0.99, 1.1)<br>(0.10) | 1.1 (0.9, 1.3),<br>(0.10)           | 1.0 (0.98, 1.1)<br>(0.20) | 1.1 (0.97,<br>1.3), (0.10)          | 1.0 (0.96, 1.1)<br>(0.50) |

Note: N, number; OR, odds ratio; CI, confidence interval.

<sup>a</sup> Model 0 (M0) is adjusted for age categories (5-year categories) and residence (provinces)

<sup>b</sup> Model 1 (M1) is adjusted for M0 plus cigarette smoking status and intensity.

<sup>c</sup> Model 2 (M2) is adjusted for M1 plus opium consumption.
